# Supplementary figures and images for: Kinetics and mechanisms of the reduction of a cis-dioxoruthenium(vi) complex by [Ni(tacn)2]2+ and [Fe(H2O)6]2+
Source: Royal Society of Chemistry journal article supplement (doi:10.1039/b202230c), 2002-01-01

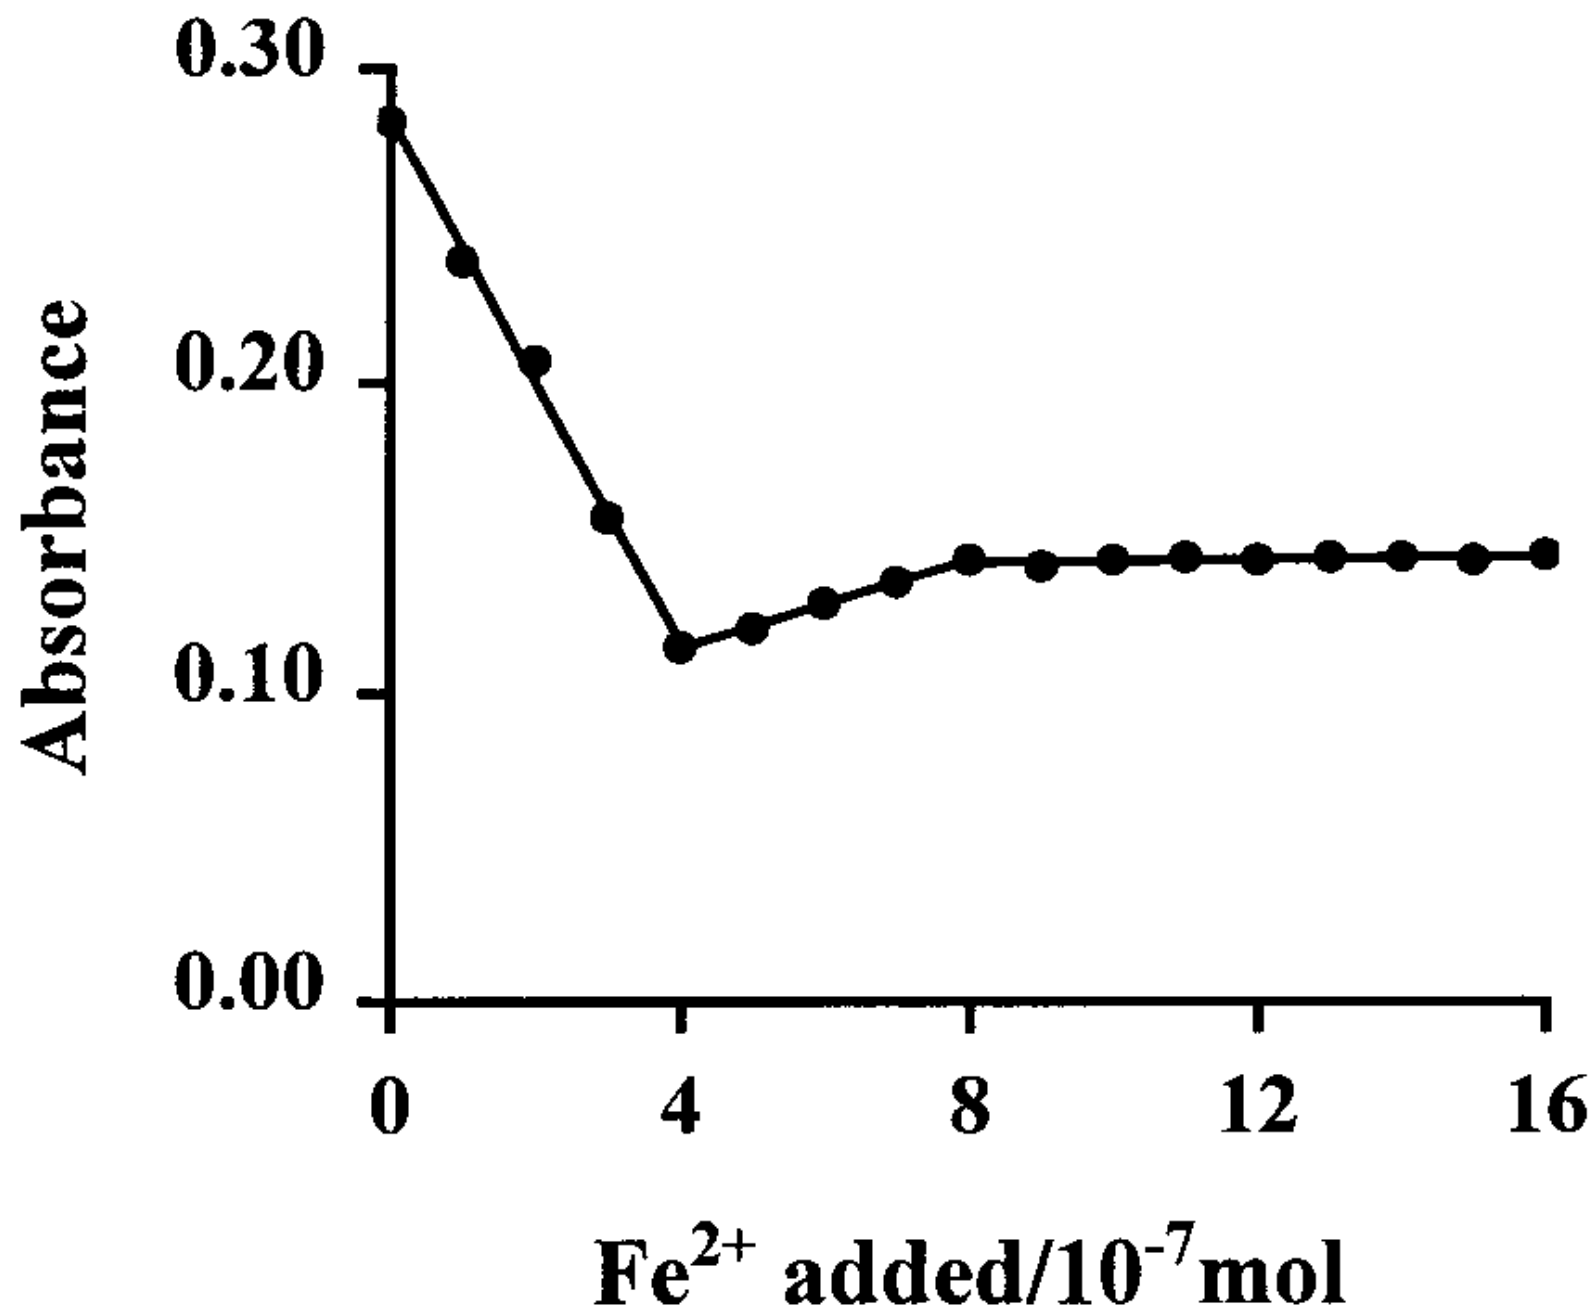

Supplement: b202230c.pdf [file b202230c.pdf]
